# Supplementary material for: Last Decade Progress in Understanding and Modeling the Land Surface Processes on the Tibetan Plateau
Source: Copernicus journal article supplement (doi:10.5194/hess-2020-348), 2020-07-21
Supplement: Supplementary file [file hess-2020-348-AC3-supplement.pdf]

Response to Anonymous Referee #3

| Reviewer comment                                                                                                                                                                                                                                                  | Response                                                                                                                                |
|-------------------------------------------------------------------------------------------------------------------------------------------------------------------------------------------------------------------------------------------------------------------|-----------------------------------------------------------------------------------------------------------------------------------------|
| <p>This review has great value in summarizing the progresses in land surface researches of the Tibetan Plateau and thus provides perspectives in future researches. The paper was well organized and written.</p>                                                 | <p>We thank the reviewer's comments and encouragement.</p>                                                                              |
| <p>Regarding to the supporting data, it is worth to review the calibration and validation site and reanalysis datasets, including soil moisture and so on. And how does them help the "observation-based" land surface researches proposed by Kun Yang et al.</p> | <p>We thank the reviewer's suggestions. We will consider how the observation data helps to improve land surface modeling on the TP.</p> |
| <p>In addition, it may also be worthwhile to mention data driven methods' potential in this area. Ref: 1. Deep learning process understanding data-driven Earth system science; 2. Big Earth data: A new frontier in Earth and information sciences</p>           | <p>We thank the reviewer's suggestions. We will add the data driven methods in the perspectives part.</p>                               |
